# Supplementary material
Source: Springer Nature journal article supplement (https://www.springermedizin.de/resource/supplementary/12865_2005_81_MOESM7_ESM.pdf/9428468)

### Correlation of qPCR and Flow Results in Liver

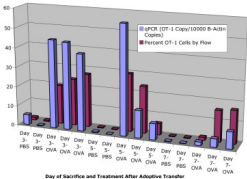

Supplement: MOESM7 [file 9428468]
